# Supplementary material for: Vitamin D Deficiency Is Associated with Advanced Liver Fibrosis and Impaired Fasting Glucose in Alcohol Use Disorder
Source: MDPI journal article supplement (doi:10.3390/nu16081099), 2024-04-09
Supplement: s1 [file s1]

STROBE Statement—Checklist of items that should be included in reports of *cross-sectional studies*

|                              | Item No | Recommendation                                                                                                                                                                                   |                                                                                                           |
|------------------------------|---------|--------------------------------------------------------------------------------------------------------------------------------------------------------------------------------------------------|-----------------------------------------------------------------------------------------------------------|
| Title and abstract           | 1       | (a)                                                                                                                                                                                              | Indicate the study's design with a commonly used term in the title or the abstract<br>Page 1              |
|                              |         | (b)                                                                                                                                                                                              | Provide in the abstract an informative and balanced summary of what was done and what was found<br>Page 1 |
| Introduction                 |         |                                                                                                                                                                                                  |                                                                                                           |
| Background/rationale         | 2       | Explain the scientific background and rationale for the investigation being reported<br>Page 1-2                                                                                                 |                                                                                                           |
| Objectives                   | 3       | State specific objectives, including any prespecified hypotheses<br>Page 2                                                                                                                       |                                                                                                           |
| Methods                      |         |                                                                                                                                                                                                  |                                                                                                           |
| Study design                 | 4       | Present key elements of study design early in the paper<br>Page 2-3                                                                                                                              |                                                                                                           |
| Setting                      | 5       | Describe the setting, locations, and relevant dates, including periods of recruitment, exposure, follow-up, and data collection<br>Page 2-3                                                      |                                                                                                           |
| Participants                 | 6       | Give the eligibility criteria, and the sources and methods of selection of participants<br>Page 2-3                                                                                              |                                                                                                           |
| Variables                    | 7       | Clearly define all outcomes, exposures, predictors, potential confounders, and effect modifiers. Give diagnostic criteria, if applicable<br>Page 2-3                                             |                                                                                                           |
| Data sources/<br>measurement | 8*      | For each variable of interest, give sources of data and details of methods of assessment (measurement). Describe comparability of assessment methods if there is more than one group<br>Page 2-3 |                                                                                                           |
| Bias                         | 9       | Describe any efforts to address potential sources of bias<br>Page 2-3                                                                                                                            |                                                                                                           |
| Study size                   | 10      | Explain how the study size was arrived at<br>Page 2-3                                                                                                                                            |                                                                                                           |
| Quantitative variables       | 11      | Explain how quantitative variables were handled in the analyses. If applicable, describe which groupings were chosen and why<br>Page 2-3                                                         |                                                                                                           |
| Statistical methods          | 12      | (a)                                                                                                                                                                                              | Describe all statistical methods, including those used to control for confounding<br>Page 3               |
|                              |         | (b)                                                                                                                                                                                              | Describe any methods used to examine subgroups and interactions<br>Page 3                                 |
|                              |         | (c)                                                                                                                                                                                              | Explain how missing data were addressed<br>Page 3                                                         |
|                              |         | (d)                                                                                                                                                                                              | If applicable, describe analytical methods taking account of sampling strategy N/A                        |
|                              |         | (e)                                                                                                                                                                                              | Describe any sensitivity analyses N/A                                                                     |
| Results                      |         |                                                                                                                                                                                                  |                                                                                                           |

|                          |     |     |                                                                                                                                                                                                                      |
|--------------------------|-----|-----|----------------------------------------------------------------------------------------------------------------------------------------------------------------------------------------------------------------------|
| Participants             | 13* | (a) | Report numbers of individuals at each stage of study—eg numbers potentially eligible, examined for eligibility, confirmed eligible, included in the study, completing follow-up, and analysed<br>Page 3-4            |
|                          |     | (b) | Give reasons for non-participation at each stage<br>Page 3-4                                                                                                                                                         |
|                          |     | (c) | Consider use of a flow diagram N/A                                                                                                                                                                                   |
| Descriptive data         | 14* | (a) | Give characteristics of study participants (eg demographic, clinical, social) and information on exposures and potential confounders<br>Page 3-4                                                                     |
|                          |     | (b) | Indicate number of participants with missing data for each variable of interest<br>Page 4                                                                                                                            |
| Outcome data             | 15* |     | Report numbers of outcome events or summary measures<br>Page 5                                                                                                                                                       |
| Main results             | 16  | (a) | Give unadjusted estimates and, if applicable, confounder-adjusted estimates and their precision (eg, 95% confidence interval). Make clear which confounders were adjusted for and why they were included<br>Page 2-6 |
|                          |     | (b) | Report category boundaries when continuous variables were categorized N/A                                                                                                                                            |
|                          |     | (c) | If relevant, consider translating estimates of relative risk into absolute risk for a meaningful time period N/A                                                                                                     |
| Other analyses           | 17  |     | Report other analyses done—eg analyses of subgroups and interactions, and sensitivity analyses N/A                                                                                                                   |
| <b>Discussion</b>        |     |     |                                                                                                                                                                                                                      |
| Key results              | 18  |     | Summarise key results with reference to study objectives<br>Page 6                                                                                                                                                   |
| Limitations              | 19  |     | Discuss limitations of the study, taking into account sources of potential bias or imprecision. Discuss both direction and magnitude of any potential bias<br>Page 8                                                 |
| Interpretation           | 20  |     | Give a cautious overall interpretation of results considering objectives, limitations, multiplicity of analyses, results from similar studies, and other relevant evidence<br>Page 8                                 |
| Generalisability         | 21  |     | Discuss the generalisability (external validity) of the study results<br>Page 8                                                                                                                                      |
| <b>Other information</b> |     |     |                                                                                                                                                                                                                      |
| Funding                  | 22  |     | Give the source of funding and the role of the funders for the present study and, if applicable, for the original study on which the present article is based<br>Page 8                                              |

\*Give information separately for exposed and unexposed groups.
